1  
2

### 3 Acid and inflammatory sensitisation of naked mole-rat colonic 4 afferent nerves

5  
6  
7

#### 8 Authors

9 James R.F. Hockley<sup>1§</sup>, Toni S. Taylor<sup>1</sup>, Gerard Callejo<sup>1</sup>, Zoe M. Husson<sup>1#</sup>, Ewan St. J.  
10 Smith<sup>1\*</sup>

11

#### 12 Affiliations

13 <sup>1</sup>Department of Pharmacology, University of Cambridge, Cambridge, Cambridgeshire,  
14 United Kingdom

15

16 <sup>§</sup>Current Address: Adaptive Immunology Research Unit, GlaxoSmithKline, Medicines  
17 Research Centre, Gunnels Wood Road, Stevenage, Hertfordshire, United Kingdom

18

19 <sup>#</sup>Current Address: INSERM U1215, Université Bordeaux, Bordeaux, France

20

21 \*Corresponding author

22 Email: [es336@cam.ac.uk](mailto:es336@cam.ac.uk)

## 23 Abstract

24 Acid sensing in the gastrointestinal tract is required for gut homeostasis and the  
25 detection of tissue acidosis caused by ischaemia, inflammation and infection. In the  
26 colorectum, activation of colonic afferents by low pH contributes to visceral  
27 hypersensitivity and abdominal pain in human disease including during inflammatory  
28 bowel disease. The naked mole-rat (*Heterocephalus glaber*; NMR) shows no pain-  
29 related behaviour to subcutaneous acid injection and cutaneous afferents are  
30 insensitive to acid, an adaptation thought to be a consequence of the subterranean,  
31 likely hypercapnic, environment in which it lives. As such we sought to investigate  
32 whether NMR interoception within the gastrointestinal tract differed from other rodents,  
33 specifically the mouse. Here we show the presence of calcitonin gene regulated  
34 peptide (CGRP) expressing extrinsic nerve fibres innervating both mesenteric blood  
35 vessels and the myenteric plexi of the smooth muscle layers of the NMR colorectum.  
36 Using *ex vivo* colonic-nerve electrophysiological recordings we show differential  
37 sensitivity of NMR, compared to mouse, colonic afferents to acid and the prototypic  
38 inflammatory mediator bradykinin, but not direct mechanical stimuli. In NMR, but not  
39 mouse, we observed mechanical hypersensitivity to acid, whilst both species  
40 sensitised to bradykinin. Collectively, these findings suggest that NMR colonic  
41 afferents are capable of detecting acidic stimuli however their intracellular coupling to  
42 downstream molecular effectors of neuronal excitability and mechanotransduction  
43 likely differs between species.

44

## 45 Keywords

46 Acid, bradykinin, mechanosensation, sensitisation, visceral pain

## 47 Introduction

48 The gastrointestinal tract coordinates the digestion of food, absorption of nutrients and  
49 evacuation of waste with acidification of the stomach contents a critical component of  
50 this process. Through compartmentalisation, sensory surveillance and specialised  
51 mucosal defence mechanisms, not only is the breakdown of food and elimination of  
52 ingested pathogens achieved through acidification in the foregut, but also the delicate  
53 gut microbiota-host symbiosis of the hindgut maintained. It is clear that when gastric  
54 acid regulation is lost then significant pathogenesis can occur, including acid-related  
55 diseases such as gastro-eosophageal reflux disease, gastroduodenal ulceration,  
56 dyspepsia and gastritis [1]. Recent associations between gut microbiota and a diverse  
57 range of human disease, from depression, autism, schizophrenia, Alzheimer's disease  
58 and Parkinson's disease, to diabetes and obesity [2], also highlight the significant  
59 impact that alterations in the gut luminal environment, including pH on which this  
60 microbiota rely, can have on human behaviour, mood and physiology.

61

62 Sensory neurones innervating the gastrointestinal tract are central to the feedback  
63 regulation of gastric acid secretion and can additionally detect tissue acidosis caused  
64 by inflammation, ischaemia and microbial activity [3,4], often resulting in visceral  
65 hypersensitivity and abdominal pain [5]. Whilst luminal pH varies along the length of  
66 the healthy human gut (with lower pH found in the stomach and colon [6,7]), both  
67 surgical intervention and disease (e.g. chronic pancreatitis and inflammatory bowel  
68 disease [6,8,9]; a significant symptom of which is abdominal pain) can also result in  
69 abnormal acidification of the gut.

70

71 The naked mole-rat (*Heterocephalus glaber*; NMR) has adaptations enabling it to not  
72 only survive but prosper in the subterranean (thus likely hypercapnic and hypoxic)  
73 environment in which it lives. Many of these adaptations have led to altered sensory  
74 processing of external stimuli, for example the NMR shows no pain-related behaviour  
75 to subcutaneous injection of acid and capsaicin [10], lacks an itch response to  
76 histamine [11] and shows no thermal hyperalgesia in response to a variety of stimuli,  
77 including nerve growth factor [10,12]. These adaptations are believed to provide a  
78 fitness advantage to living in a subterranean environment, for example, the likely high  
79 CO<sub>2</sub> environment of NMR nests would evoke noxious stimulation of C-fibres through

80 acidosis in almost any other rodent [13]. Whilst clearly valuable in supporting its  
81 lifestyle in its niche, detection of acid by sensory neurones innervating the gut is  
82 required for maintenance of gut homeostasis and for the detection of tissue acidosis.  
83 In other rodent species, viscerally-projecting afferent fibres can sense tissue acidosis  
84 by specialised ion channels [1] including acid-sensing ion channels (ASICs; which  
85 respond to mild acidification), transient receptor potential vanilloid subtype (TRPV1;  
86 which are gated by severe acidosis), ionotropic purinoceptor ion channels (e.g. P2X<sub>3</sub>)  
87 and two-pore domain potassium channels (e.g. TASK, TRESK, TREK and TRAAK  
88 subtypes). Additionally, a number of proton-sensing G protein-coupled receptors exist  
89 that are also sensitive to mild acidification (e.g. Gpr68, Gpr4, Gpr132 and Gpr65). In  
90 the mouse colorectum, TRPV1 and ASIC3 are necessary for proton sensing by the  
91 vast majority of colonic afferents [14]. Recent single-cell RNA-sequencing analysis of  
92 colonic sensory neurones suggests that TRPV1 and ASIC3 are mainly expressed by  
93 discrete populations of mouse colonic afferents, namely the mPEPb and pPEP  
94 subtypes for TRPV1 and the mNFb, mPEPa and pNF subtypes for ASIC3; suggesting  
95 functional specialism [15]. Of the 4 acid-sensing GPCRs, only Gpr68 is expressed by  
96 mouse colonic afferents [15]. Compared to mice, NMRs display a similar expression  
97 profile of ASICs throughout the nervous system [16], and of those analysed, with the  
98 exception of ASIC3, NMR acid sensors show similar activation profiles to those of mice  
99 [12,17,18]. NMR TRPV1 is also expressed in sensory afferents and shows similar  
100 proton sensitivity to mouse TRPV1 [17]. The NMR acid-insensitivity is likely due to an  
101 amino acid variation in the voltage-gated sodium channel 1.7 subunit (Nav1.7), which  
102 results in acid anaesthetising, rather than activating their cutaneous sensory neurones  
103 [17]. Considering the unusual cutaneous acid-insensitivity of the NMR, it is of interest  
104 to determine how GI sensory surveillance and detection of visceral tissue acidosis  
105 occurs in this species, especially considering the growing reputation of the NMR as a  
106 model of healthy ageing [19] and the perturbation of GI function that occurs with ageing  
107 [20]. In order to investigate this, we examined the sensory innervation of the NMR  
108 colon and made electrophysiological recordings in both NMR and mouse from the  
109 lumbar splanchnic nerve innervating the colorectum, and applied noxious mechanical  
110 and chemical stimuli, including acid and bradykinin, a prototypic inflammatory  
111 mediator.  
112

## 113 Materials and Methods

### 114 Animals

115 Experiments were performed in C57BL6/J mice (6-41 wks; 3F, 3M) and NMR (25-146  
116 wks; 2F, 5M). Mice were conventionally housed with nesting material and a red plastic  
117 shelter in temperature-controlled rooms (21 °C) with a 12 h light/dark cycle and access  
118 to food and water *ad libitum*. NMRs were bred in-house and maintained in an inter-  
119 connected network of cages in a humidified temperature-controlled room (28 °C) with  
120 red lighting (08:00-16:00) and had access to food *ad libitum*. In addition, a heat cable  
121 provided extra warmth under 2-3 cages/colony. Experiments were conducted under  
122 the Animals (Scientific Procedures) Act 1986 Amendment Regulations 2012 under  
123 Project Licenses (70/7705 & P7EBFC1B1) granted to E. St. J. Smith by the Home  
124 Office and approved by the University of Cambridge Animal Welfare Ethical Review  
125 Body.

126

### 127 Immunohistochemistry

128 NMR were humanely killed by CO<sub>2</sub> exposure followed by decapitation. The colorectum  
129 was dissected free before opening along the mesenteric border and pinning flat in a  
130 Sylgard lined dissection tray. After fixing in Zamboni's fixative (2 % paraformaldehyde  
131 / 15 % picric acid in 0.1 M phosphate buffer; pH 7.4) overnight, the mesentery and  
132 mucosa were dissected free from the muscle layers. Small 1.5 cm x 1.5 cm sections  
133 were subsequently washed in 100 % DMSO (3 x 10 min) and phosphate buffered  
134 saline (PBS; 3 x 10 min). Tissues were blocked with antibody diluent (10 % donkey  
135 serum, 1 % bovine serum albumin (BSA) in 0.2 % Triton X-100) for 1 h, then primary  
136 antibodies were applied overnight at 4 °C. The following day, tissues were washed  
137 (PBS, 3 x 10 min), donkey anti-rabbit IgG-AF488 (1:500, Life Technologies A21206)  
138 antibody applied for 2 h, washed (PBS; 3 x 10 min), mounted and coverslipped.  
139 Primary antibodies used were rabbit anti-calcitonin gene-related peptide (1:5000,  
140 Sigma C8198) and rabbit anti-protein gene product 9.5 (1:500, Abcam ab10404). No  
141 labelling was observed in control sections where primary antibody was excluded.  
142 Tissues were imaged using a Leica SP5 confocal microscope and z-stack  
143 reconstructions of nerve fibres within different layers of the NMR gut produced with  
144 ImageJ (v1.51a, NIH).

## 145 Electrophysiology recordings of visceral afferent activity

146 Colonic nerves innervating the colorectum of mouse and NMR were isolated and  
147 electrophysiological activity was recorded as previously described [21]. Mice were  
148 humanely killed by cervical dislocation of the neck and cessation of circulation. NMRs  
149 were humanely killed by CO<sub>2</sub> exposure followed by decapitation. For both species, the  
150 colorectum with associated lumbar splanchnic nerve was dissected free from the  
151 animal and transferred to a recording chamber superfused with carbogenated Krebs  
152 buffer (in mM: 124 NaCl, 4.8 KCl, 1.3 NaH<sub>2</sub>PO<sub>4</sub>, 2.5 CaCl<sub>2</sub>, 1.2 MgSO<sub>4</sub>·7H<sub>2</sub>O, 11.1  
153 glucose and 25 NaHCO<sub>3</sub>; 7 ml/min; 32-34 °C). The colorectum was cannulated and  
154 perfused with Krebs buffer (100 µl/min) enabling distension of the colon by closure of  
155 the out-flow. The Krebs buffer was supplemented with nifedipine (10 µM) and atropine  
156 (10 µM) to inhibit smooth muscle activity and with indomethacin (3 µM) to restrict  
157 endogenous prostanoid production. Multi-unit electrophysiological activity of the  
158 lumbar splanchnic nerve rostral to the inferior mesenteric ganglia was recorded using  
159 a borosilicate glass suction electrode. Signals were amplified and bandpass filtered  
160 (gain 5K; 100-1300 Hz; Neurolog, Digitimer Ltd, UK) and digitised at 20 kHz  
161 (micro1401; Cambridge Electronic Design, UK) before display on a PC using Spike 2  
162 software. The signal was digitally filtered online for 50 Hz noise (Humbug, Quest  
163 Scientific, Canada) and action potential firing counts were determined using a  
164 threshold of twice the background noise (typically 100 µV).

165

166

## 167 Electrophysiological protocols

168 Tissues were stabilised for 30 min before noxious intraluminal distension pressures  
169 were applied by blocking the luminal out-flow of the cannulated mouse or NMR  
170 colorectum. The pressures reached are above threshold for all known visceral afferent  
171 mechanoreceptors [22] and evoke pain behaviours in rodents *in vivo* [23].  
172 Mechanosensitivity and chemosensitivity were investigated using a combined  
173 sequential protocol. As such, a slow ramp distension (0-80 mmHg, 4-5 min) and set of  
174 6 rapid phasic distensions (0-80 mmHg, 60 s at 9 min intervals) were applied as  
175 previously described [24] prior to bath superfusion of pH 4.0 Krebs buffer (50 mL  
176 volume) and a set of 3 phasic distensions (0-80 mmHg, 60 s at 9 min) to test for acid-  
177 induced acute mechanical hypersensitivity. After a 20 min wash-out period, 1  $\mu$ M  
178 bradykinin was applied by bath superfusion (20 mL volume) and a further set of 3  
179 phasic distensions were performed. Phasic distension protocols were automated  
180 using an Octaflow II perfusion system (ALA Scientific, USA) to standardise duration  
181 and intervals.

182

## 183 Data analysis

184 Peak changes in firing rates of electrophysiological nerve recordings were determined  
185 by subtracting baseline firing (3 min before distension or drug application) from  
186 increases in nerve activity following distension or chemical stimuli. Statistical analysis  
187 was performed using two-way analysis of variance (ANOVA) followed by Sidak's post  
188 hoc test in Prism 6 (GraphPad Inc., USA). Statistical significance was set at  $P < 0.05$ .  
189 Data are displayed as means  $\pm$  SEM.

190

## 191 Drugs

192 Stock concentrations of bradykinin (10 mM; water), nifedipine (100 mM; DMSO),  
193 atropine (100 mM; ethanol) and indomethacin (30 mM; DMSO) were dissolved as  
194 described, diluted to working concentration in Krebs buffer on the day of experiment  
195 as described above and were all purchased from Sigma-Aldrich.

## 196 Results

### 197 Gastrointestinal neuroanatomy of the NMR

198 We first compared the gross anatomy of the NMR and mouse gastrointestinal tract.

199 As the NMR is greatly long lived compared to the mouse, with a life expectancy of  
200 >30-years, we chose animals of an equivalent phase of life and body size (e.g. young  
201 adult: for mouse, 6-8-weeks, snout to anus length 92 mm and for NMR, 76-weeks,  
202 snout to anus length 113 mm). Compared to the mouse, the NMR colorectum (from  
203 caecum to anus) length was broadly equivalent (mouse, 60 mm; NMR, 70mm), whilst  
204 the caecum and stomach were greatly enlarged and the small intestine (from the  
205 caecum to pyloric sphincter of the stomach) was shorter in length (mouse, 312 mm;  
206 NMR, 165 mm; Fig. 1A).

207



208 We next confirmed the presence of extrinsic sensory fibres innervating different layers  
209 of the NMR colorectum using immunohistochemistry. Equivalent staining in the mouse  
210 are widely available within the literature and we did not seek to duplicate them here  
211 [25]. Using antibodies raised against calcitonin gene-related peptide (CGRP) and  
212 protein gene product 9.5 (PGP9.5) we stained for neuronal fibres within flat-sheet  
213 whole-mount preparations of multiple layers of the NMR colon. Specifically, CGRP-  
214 positive extrinsic neuronal varicosities were identified encircling and tracking with  
215 blood vessels within the mesentery supplying the distal colon of NMR; such fibres  
216 likely contribute to the larger lumbar splanchnic nerve upon which these coalesce (Fig.  
217 1B). Although NMR lack CGRP in cutaneous afferent neurones, this finding is in line  
218 with the observation that mesenteric arteries in NMR and the common mole-rat  
219 (*Cryptomys hottentotus*) express CGRP [26]. Neuronal fibres staining for PGP9.5  
220 were also observed within the mesentery of NMR, again localised around blood  
221 vessels (Fig. 1E). The mucosa and submucosa were separated from the muscle  
222 (circular and longitudinal) layers. CGRP-positive, presumably extrinsic, sensory fibres  
223 were observed coursing through the myenteric plexi between these muscle layers  
224 (Fig. 1C). PGP9.5 staining revealed the myenteric soma and additional neuronal fibres  
225 within this layer of the NMR colon (Fig. 1F). Whilst PGP9.5-positive fibres were  
226 observed encircling the base of colonic villi (see Fig. 1G insert), CGRP labelling of  
227 these fibres was not seen (Fig. 1D). Interdigitating fibres within both the circular and  
228 longitudinal muscle layers are positive for PGP9.5 (Fig. 1H and 1I), with what is likely  
229 submucosal ganglia retained on the circular muscle layer after separation of the  
230 mucosa from this layer (Fig. 1H).

231

232 Colonic afferent mechanosensitivity does not differ in the NMR compared  
233 to mouse

234

235 In order to understand whether the peripheral terminals of sensory neurones  
236 innervating the gastrointestinal tract of the NMR possessed altered acid and  
237 inflammatory sensitivity compared to mouse, we made *ex vivo* multi-unit  
238 electrophysiological recordings of lumbar splanchnic nerve activity using a suction  
239 electrode from the colorectum of both NMR and mouse. The lumbar splanchnic nerve  
240 innervates the colorectum and is a pathway through which pain is the predominant

# Figure 1

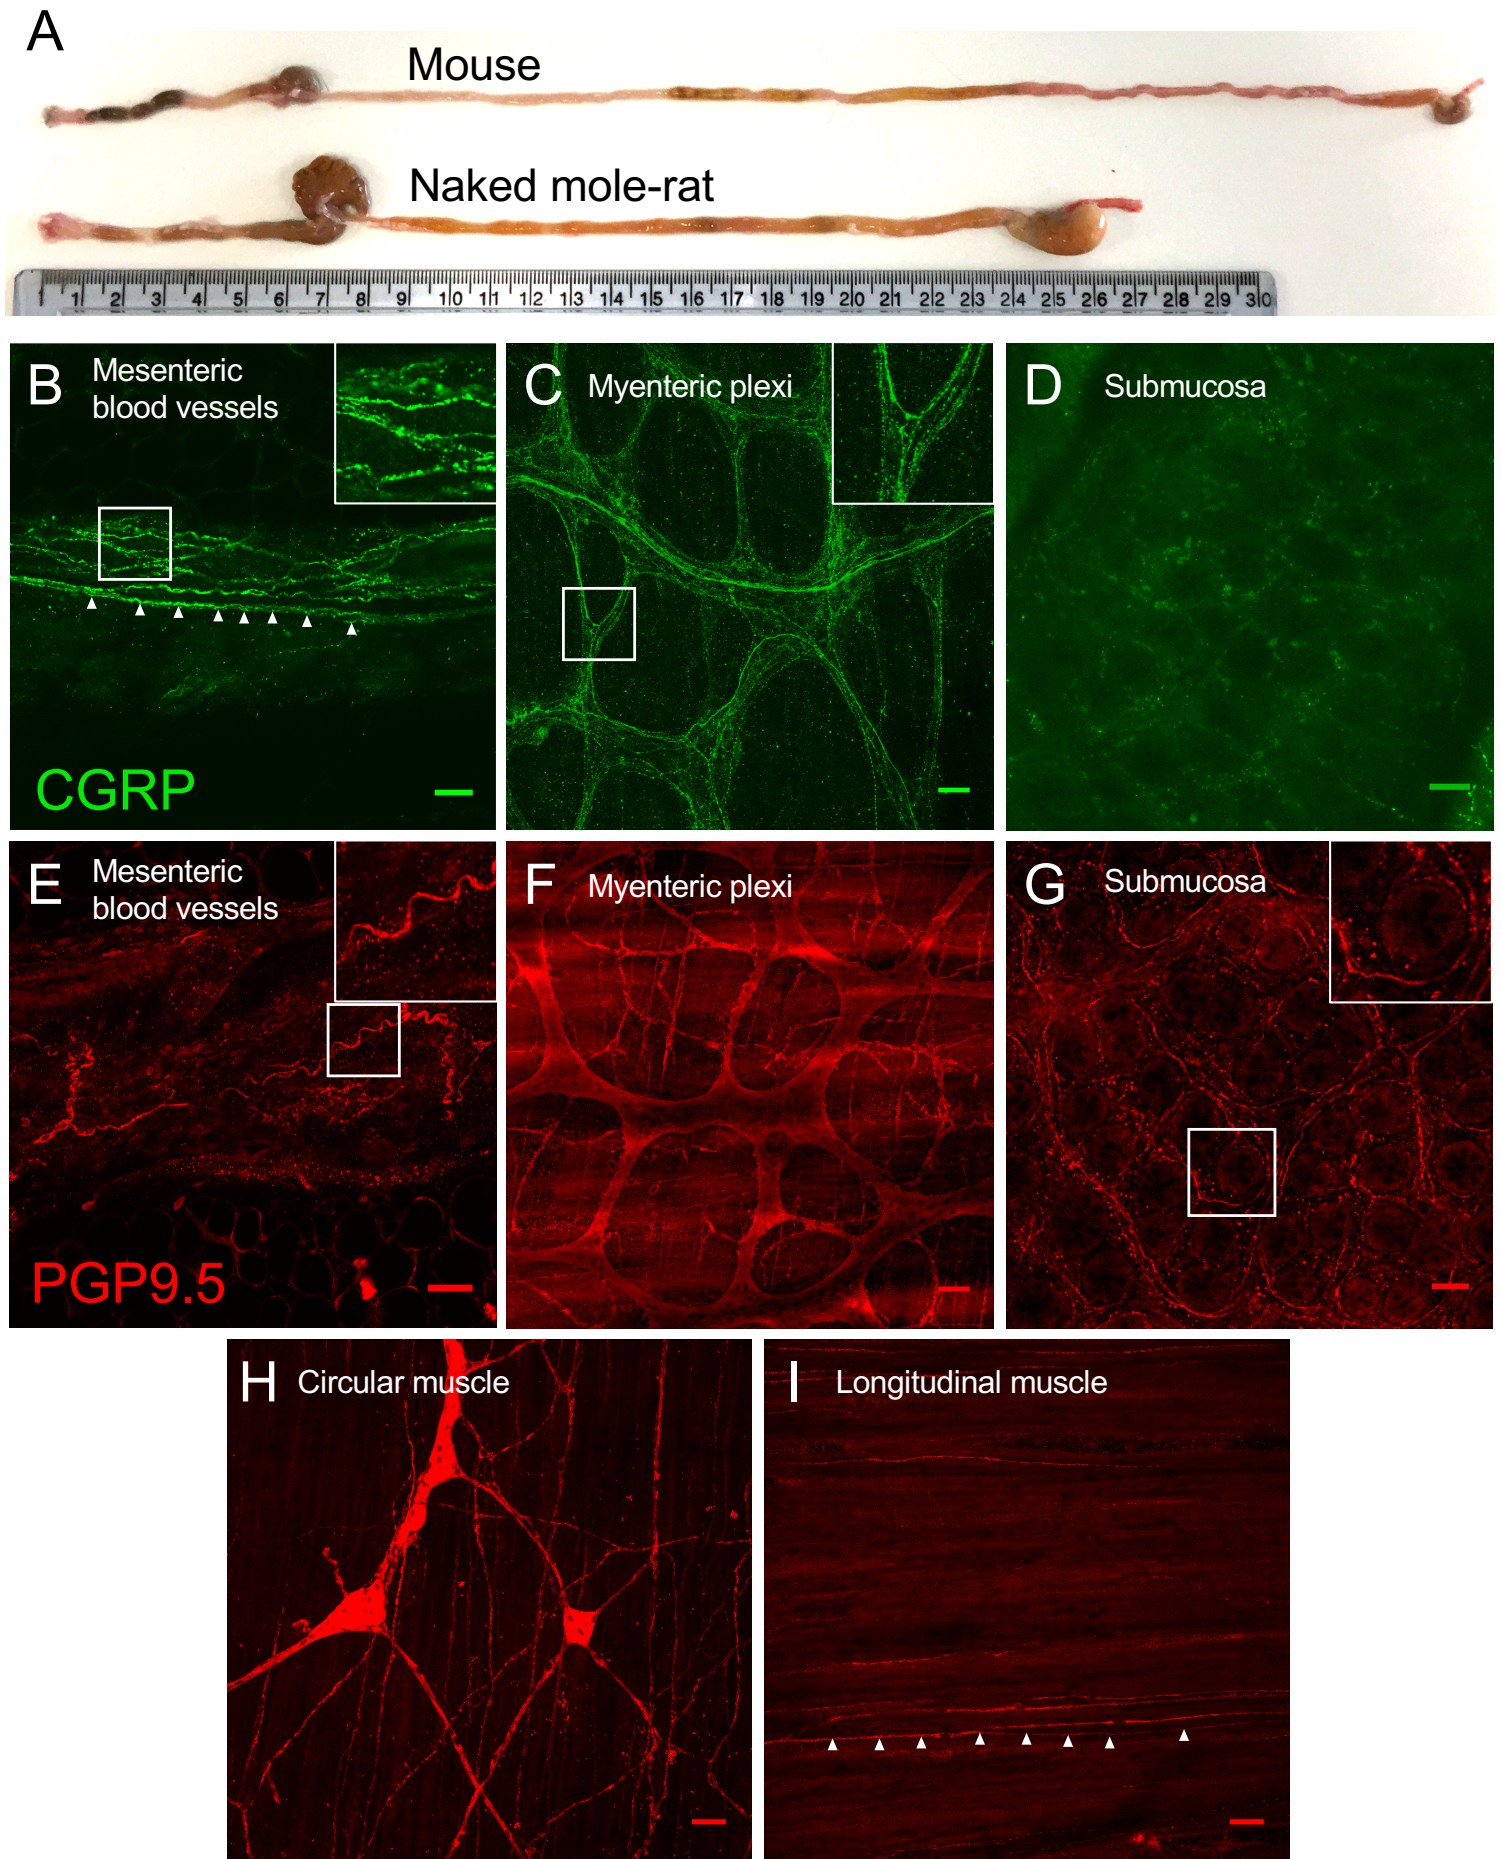

241 conscious sensation transduced [27]. The colorectum, once dissected free from the  
242 animal, was cannulated and both lumenally perfused and bath superfused with Krebs  
243 buffer, thus allowing mechanical distension of the bowel or application of chemical  
244 stimuli, respectively.

245

246 We first investigated mechanosensitivity of visceral afferents in the NMR compared to  
247 mouse gastrointestinal tract. There were no significant differences in the baseline  
248 spontaneous activity measured between NMR and mouse (3 min average:  $9.7 \pm 3.5$   
249 spikes/s vs.  $9.3 \pm 1.7$  spikes/s, respectively,  $N = 6$ ,  $P = 0.91$ , unpaired t-test). We  
250 applied known innocuous and noxious mechanical stimuli, firstly by way of a ramp  
251 distension (0 to 80 mmHg) and using repeat phasic distension (Fig. 2A). Colorectal  
252 distension by insertion via the anus of an inflatable balloon in humans evokes  
253 sensations of urge, discomfort and pain at increasing distension pressures [28].  
254 Importantly, not only the absolute pressure applied, but also the dynamic quality of the  
255 stimuli (such as rate of change in pressure and duration of application) also  
256 significantly impact the extent of afferent activation [29]. By using a slow ramp  
257 distension, we were able to assess visceral afferent responses across a range of  
258 physiologically-relevant distension pressures typically exposed to the rodent gut  
259 [29,30]. We observed no difference in the nerve firing recorded during ramp distension  
260 in NMR (e.g. at 80 mmHg,  $31.5 \pm 7.1$  spikes/s) compared to mouse (e.g. at 80 mmHg,  
261  $35.9 \pm 6.5$  spikes/s; Fig. 2B,  $P = 0.24$ ,  $N = 5-6$ , two-way ANOVA). We next applied  
262 repeat phasic distension of the colon to noxious (0-80 mmHg) pressures. As previously  
263 reported in mouse, we observed a rapid increase in nerve activity to initial phasic  
264 distension ( $100.4 \pm 5.4$  spikes/s) and significant adaptation during the 60 s distension  
265 (Fig. 2C; [21,24]). Following subsequent repeat distensions at 9 min intervals,  
266 tachyphylaxis occurred with a decrease in peak firing of 19.7 % by the sixth distension  
267 compared to the first. In NMR, afferent discharge reached an equivalent peak firing  
268 compared to mouse during the first distension and the degree of desensitisation during  
269 subsequent distensions was similar (25.8 % by the sixth distension,  $P = 0.74$ ,  $N = 6$ ,  
270 two-way repeated-measures ANOVA; Fig. 2C). Similar afferent responses to  
271 mechanical stimuli in NMR compared to mouse suggest that there is no intrinsic  
272 difference in the way sensory nerves transduce physiological and noxious mechanical  
273 stimuli.

274

## Figure 2

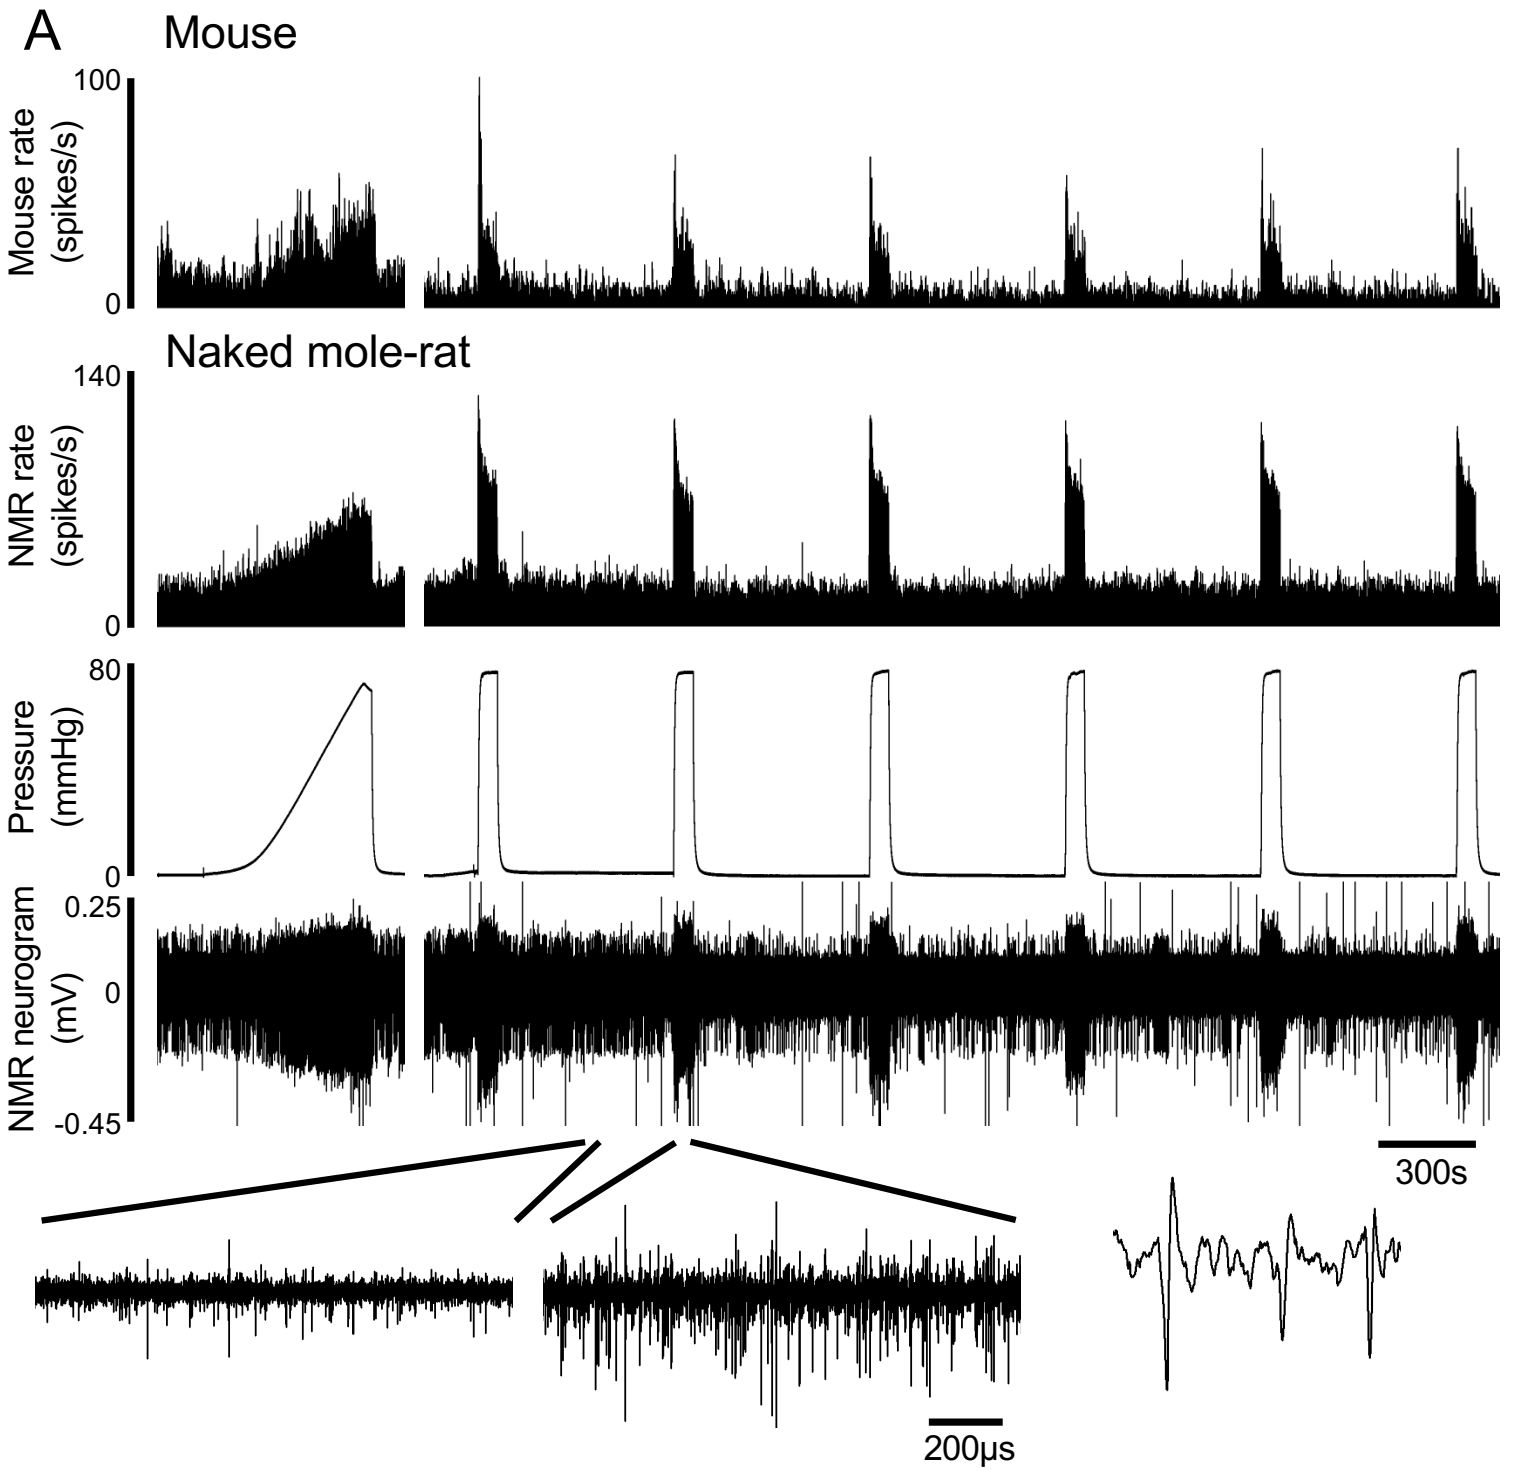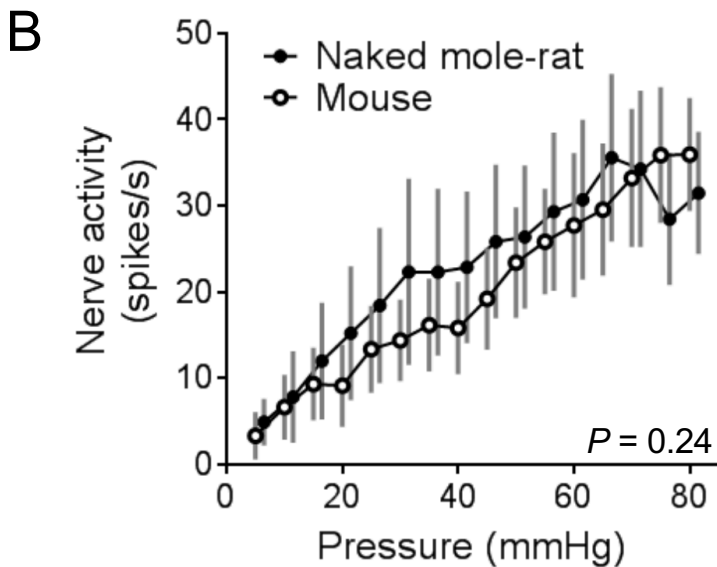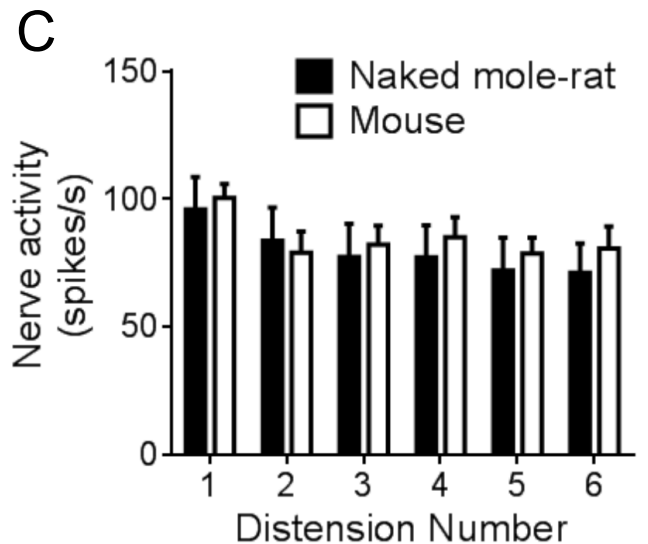

275 Extracellular acid evokes mechanical hypersensitivity in NMR but not  
276 mouse

277

278 Next, we investigated the effect of extracellular acid on visceral afferent firing and  
279 mechanical hypersensitivity to phasic distension (Fig. 3A). We chose a pH 4.0 stimulus  
280 to broadly activate acid-sensitive ion channels [31] and a stimulus that is capable of  
281 evoking pain both in humans and rodents when injected subcutaneously [10,32]. The  
282 vast majority of colonic sensory neurones possess inward sustained currents in  
283 response to low pH [14]. Bath superfusion of pH 4.0 to mouse colon directly excited  
284 visceral afferents evoking a peak firing increase of  $35.1 \pm 6.9$  spikes/s returning to  
285 baseline firing rates after  $1666 \pm 131$  s. Direct excitation of NMR visceral afferents as  
286 a result of acid did not significantly differ compared to mouse ( $17.8 \pm 5.2$  spikes/s and  
287 duration of  $1755 \pm 89$  s,  $P = 0.07$  and  $P = 0.59$ , respectively,  $N = 6$ , unpaired t-test;  
288 Fig. 3B). Immediately after returning to baseline, a set of three phasic distensions (60s,  
289 at 9 min intervals) was applied to test whether extracellular acid induced mechanical  
290 sensitisation. In agreement with previous studies in mouse, application of acid did not  
291 altered firing rates in response to any of the three subsequent phasic distensions when  
292 compared to the response prior to acid application (Fig. 3C; [33]). By contrast,  
293 extracellular acid caused significant mechanical sensitisation in the NMR, such that  
294 the response to phasic distension immediately after acid application was 63.8 %  
295 greater than before ( $P < 0.01$ ,  $N = 6$ , 2-way ANOVA with Sidak's post hoc test). This  
296 mechanical sensitisation was lost by the second post-acid phasic distention and by  
297 the third phasic distension afferent firing had recovered to baseline levels and was  
298 comparable to mouse (Fig. 3C). That low pH conditions, such as that observed during  
299 inflammation, can evoke robust mechanical hypersensitivity in NMR, but not mouse,  
300 suggests fundamental differences in the mechanism by which acid-sensitive receptors  
301 are coupled to mechanotransducers in the peripheral terminals of colonic sensory  
302 neurones.

303

304 Afferent excitation to bradykinin is blunted in NMR, but mechanical  
305 sensitisation is unaffected

306

Figure 3

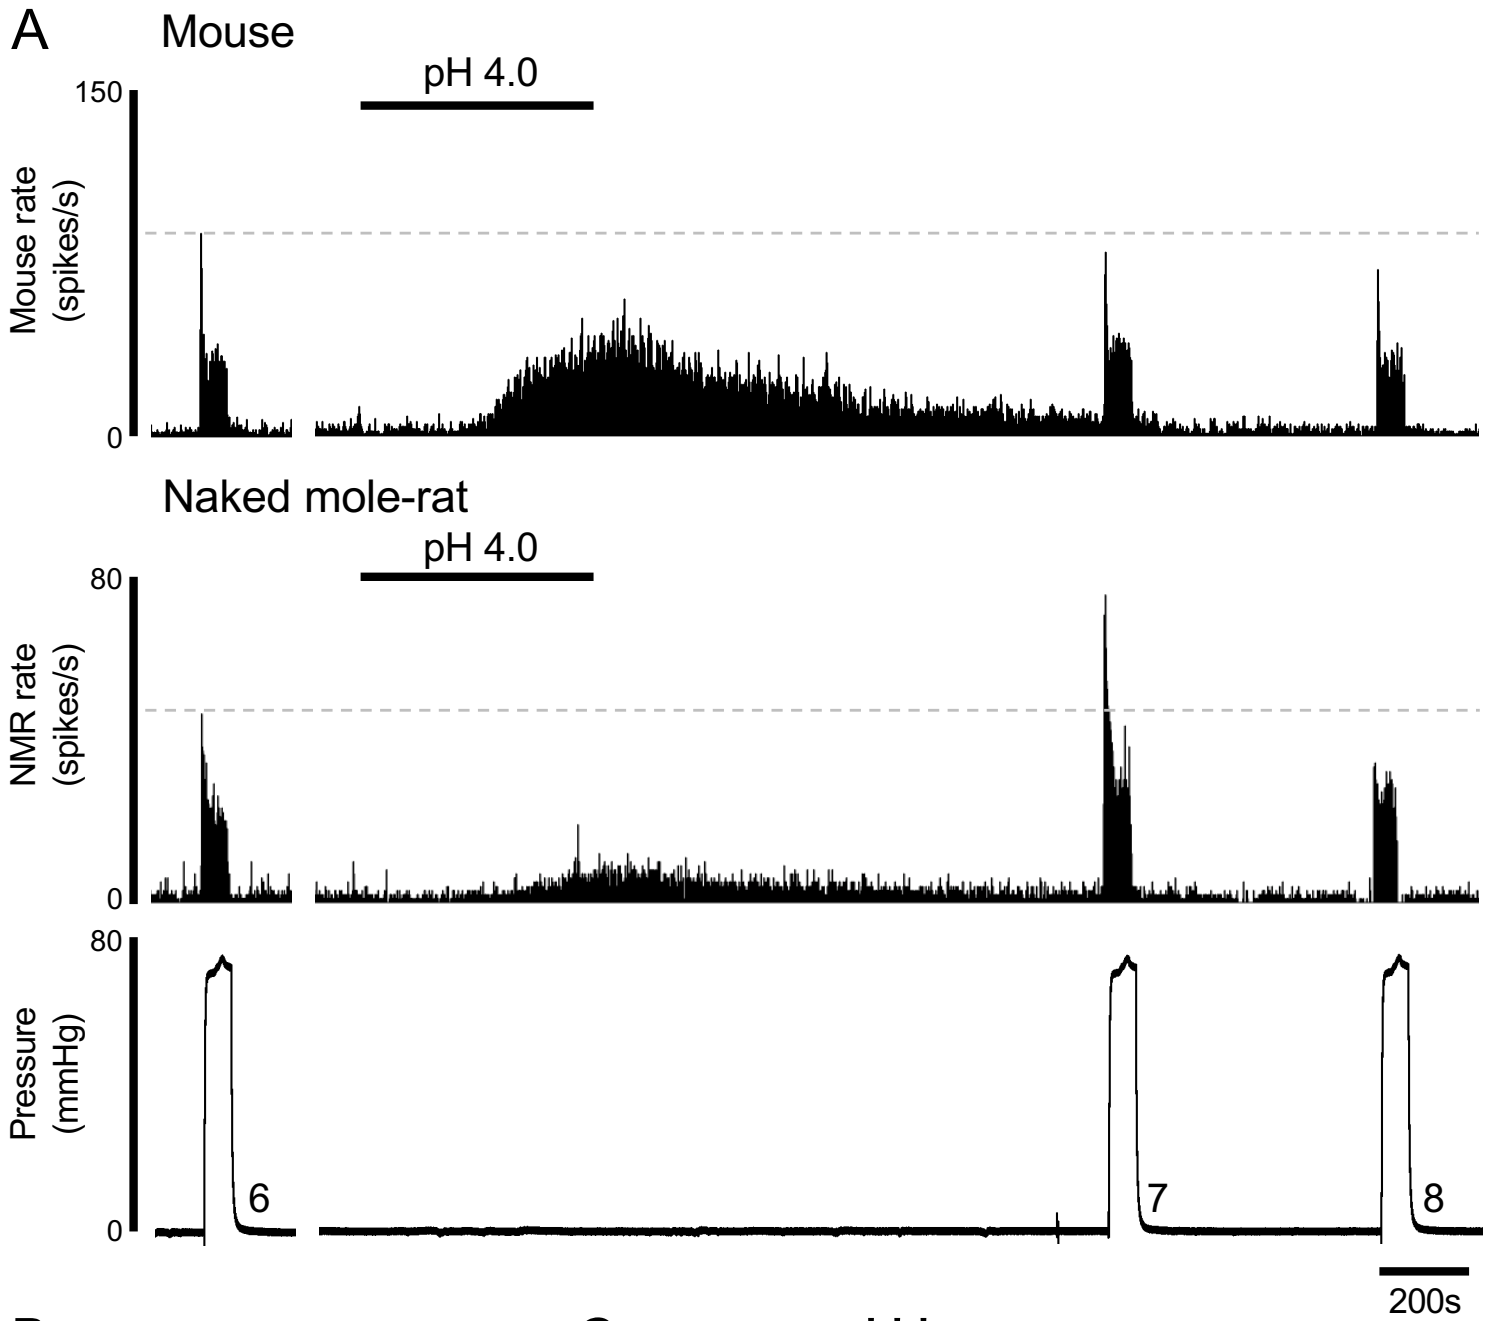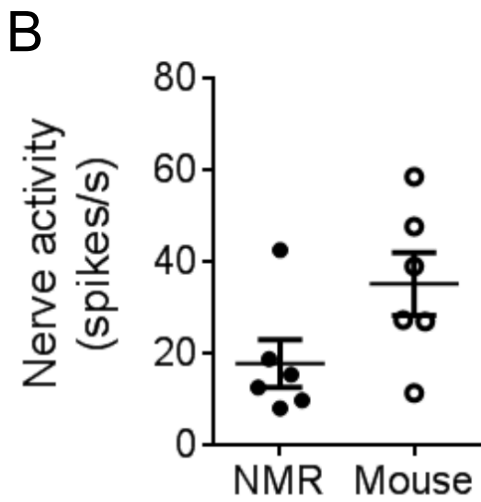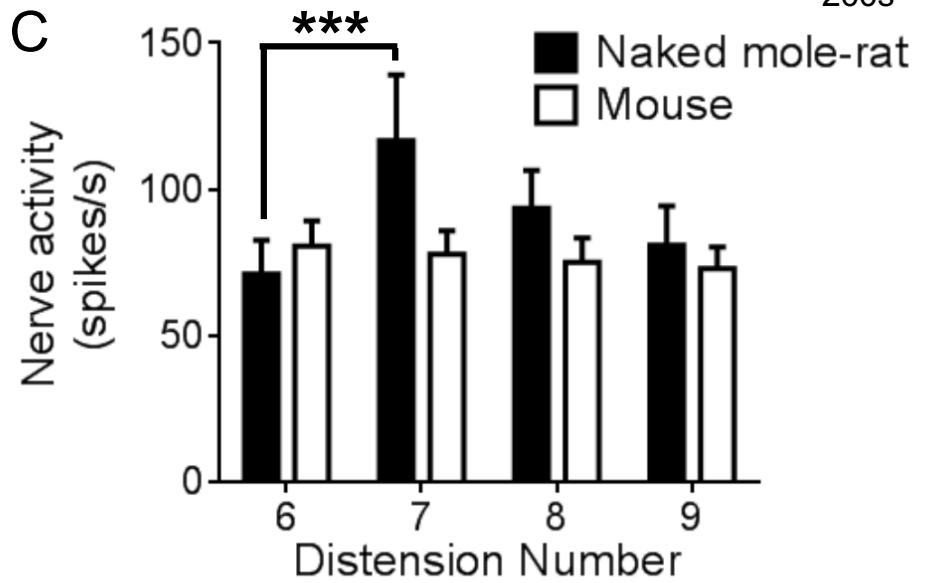

307 Given that inflammatory pain responses in NMR are blunted to some inflammatory  
308 stimuli [10], we investigated the ability for the prototypical inflammatory mediator,  
309 bradykinin, to not only activate, but evoke mechanical hypersensitivity in NMR visceral  
310 afferent fibres. Application of bradykinin (1  $\mu$ M) by bath superfusion to mouse colonic  
311 afferents led to an increase in peak firing of  $29.6 \pm 4.2$  spikes/s in agreement with  
312 previous studies in mouse and human colonic tissues (Fig. 4A; [34,35]). In NMR this  
313 was not the case, with peak firing only increased by  $5.3 \pm 2.0$  spikes/s following  
314 addition of bradykinin ( $P < 0.01$ ,  $N = 6$ , unpaired t-test; Fig. 4B). However, in both  
315 mouse and NMR, a robust mechanical hypersensitivity to phasic distension was  
316 observed immediately after bradykinin application, such that the response to 80 mmHg  
317 phasic distension was potentiated by  $\sim 25\%$  in both species (Fig. 4C). This may  
318 suggest that the bradykinin receptor B2 in NMR colonic sensory neurones couples  
319 differentially with known modulators of neuronal excitability (e.g. TRP channels,  $Ca^{2+}$ -  
320 dependent potassium channels,  $Ca^{2+}$ -activated chloride channels and  $K_v7$ ) thus  
321 limiting the ability for bradykinin to directly drive action potential firing, however it can  
322 still couple effectively to mechanotransducers facilitating their sensitisation.

Figure 4

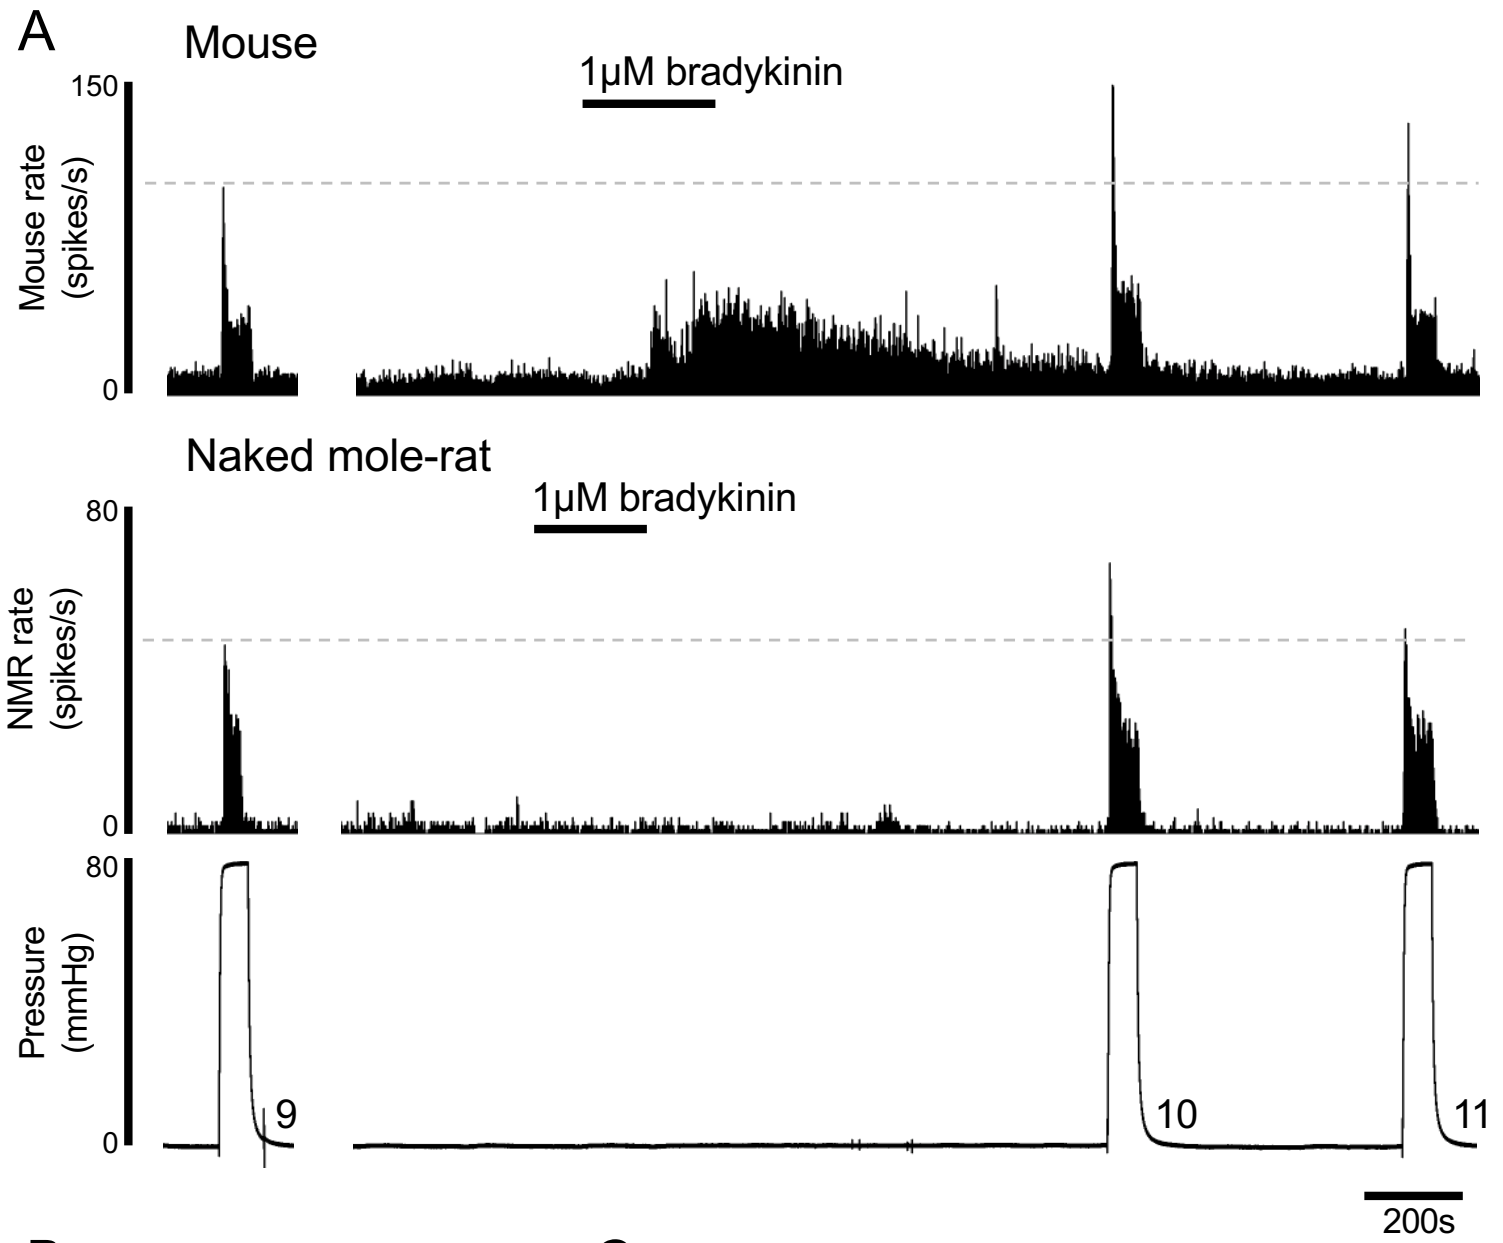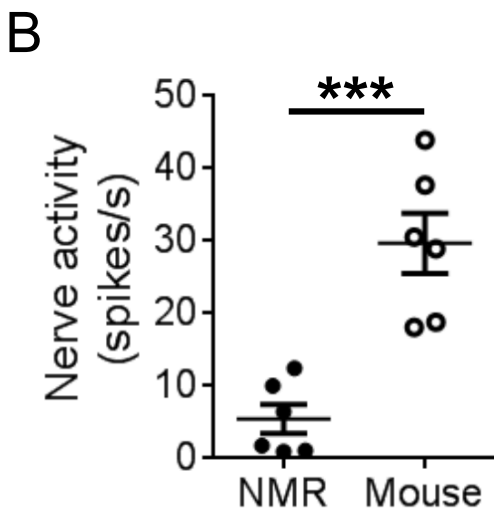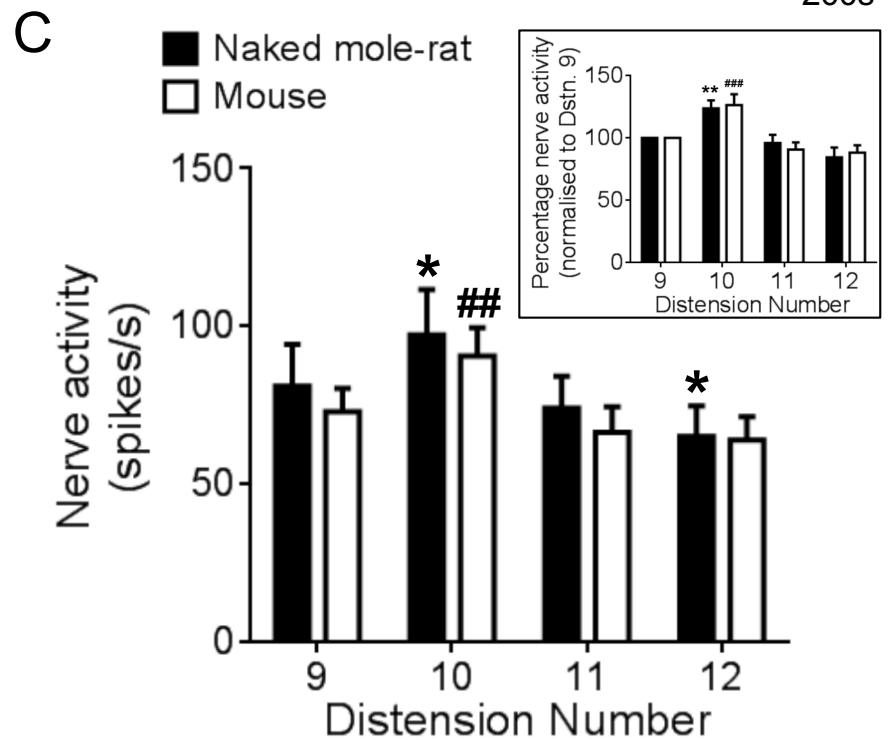



## 323 Discussion

324 Acid sensing in the gastrointestinal tract is necessary to maintain gut homeostasis by  
325 providing feedback for gastric and intestinal acid regulation, and secondly for detecting  
326 tissue acidosis caused by inflammation, infection and ischaemia during disease.  
327 Acidity is monitored by a range of cells including epithelial cells, and both intrinsic and  
328 extrinsic sensory neurones innervating the GI tract. Whilst the low pH (reaching pH 1)  
329 of the stomach is required for the physiological breakdown of ingested food and  
330 eradication of pathogens, HCl released by gastric parietal cells is not the sole source  
331 of acid in the gut [31]. Indeed, the luminal pH of the digestive system has two distinct  
332 peaks in acidity: the stomach and the proximal large bowel [6,7]. Release of  $\text{HCO}_3^-$   
333 and lactic acid from the mucosa, the microbial conversion of carbohydrates to short  
334 chain fatty acids (SCFAs: acetic, butyric and propionic acid), and lastly digestive bile  
335 acids, all contribute to luminal acidity in the large bowel [31]. The activation of acid-  
336 sensing cells drives local homeostatic changes in mucosal defence, such as changes  
337 in blood flow, secretion and repair mechanisms, and autonomic and primary afferents  
338 coordinate together to facilitate changes at an organ level (e.g. motility and secretion)  
339 and can change organism behaviour through sensation (e.g. discomfort, pain and  
340 hyperalgesia). When these systems become dysregulated then significant pathology  
341 can ensue, of which pain is often the principal symptom.

342  
343 Acid-evoked pain in the gastrointestinal tract is mediated through the activities of a  
344 number of different molecular mechanisms. In dorsal root ganglia (DRG) neurones,  
345 protons can activate fast-inactivating, largely  $\text{Na}^+$  permeable ASICs at pH levels just  
346 below physiological range (e.g. pH 7.0) [36]. In retrogradely labelled colon-projecting  
347 DRG neurones isolated from the thoracolumbar vertebrae, *in situ* hybridisation against  
348 ASIC subtypes indicates that ASIC2 is expressed at the greatest frequency, with both  
349 ASIC1 and ASIC3 present in about a quarter of neurones [37]. A number of non-  
350 selective cation transient receptor potential (TRP) channels are also sensitive to  
351 protons, for example, TRPV1 is activated by pH levels below 6.2 [38], TRPV4 can be  
352 opened by pH 6.0 and below [39], and TRPC4 and TRPC5 are active between pH 7.4  
353 and pH 7.0 [40]. Immunohistochemical analysis suggests that both TRPV1 and  
354 TRPV4 are expressed by afferents innervating the distal colon of mouse [41,42].  
355 Whilst present in DRG neurones, evidence for the expression of TRPC4 and TRPC5

356 at the protein level in a colon-specific population is lacking, however single-cell RNA  
357 sequencing efforts in this population suggest significant expression of TRPC4, but not  
358 TRPC5, mRNA, colocalising with TRPV1 expressing neurones [15]. The vast majority  
359 of colonic sensory neurones possess inward sustained currents in response to low pH  
360 indicative of TRP channel activation [14], with afferent firing observed in response to  
361 pH 6.5 [43]. Members of the two-pore domain K<sup>+</sup> (K2P) channels including TASKs,  
362 TRESK, TREK and TRAAK, which contribute to setting resting membrane potential  
363 and therefore have an important role in regulating neuronal excitability, are also  
364 sensitive to extracellular acid [44]. The expression of TREK-1, TREK-2 and TRAAK  
365 are observed in thoracolumbar and lumbosacral sensory neurones innervating the GI  
366 tract and are modulated by colitis [45]. Many P2X purinoceptors are also modulated  
367 by extracellular pH affecting the potency of ATP gating [46], and P2X<sub>2</sub> and P2X<sub>3</sub>  
368 subunits, are widely expressed by colonic sensory neurones [47,48]. Lastly, there exist  
369 4 proton-sensing G protein-coupled receptors (Gpr65, Gpr68, Gpr4 and Gpr132),  
370 which are activated by extracellular acidosis, however only mRNA for Gpr68 has been  
371 detected in colonic sensory neurones of mice [15].

372

373 Whilst many of these receptors are directly modulated by protons, the vast majority  
374 integrate additional mechano- and chemo-sensitive functions, such that acid  
375 sensitises the channel. For example, genetic ablation of ASIC3 or TRPV1 in mice  
376 causes a reduction in the visceral motor reflex (VMR) to colorectal distension and  
377 stretch sensitisation to acidic inflammatory soup; effects that are lost in ASIC3<sup>-/-</sup> mice  
378 [33]. TRPV4<sup>-/-</sup> mice possess reduced VMR to colorectal distension and significant  
379 reductions in mechanosensitivity [41]. During colitis, reductions in expression levels of  
380 K2P channels are observed [45]. Specifically, TREK-2-like currents evoked by pH 6.3  
381 and osmotic membrane stretch are attenuated, which likely contribute to the increased  
382 colonic mechanosensitivity that develops in bowel disorders such as inflammatory  
383 bowel disease [45]. Pharmacological block of P2X<sub>3</sub>-containing purinoceptors results  
384 in reductions in visceral pain behaviours in animals models and activation with  
385 selective agonist  $\alpha,\beta$ -methylene ATP can sensitise responses to mechanical stimuli  
386 [49]. Interestingly, Gpr68, the acid-sensitive GPCR with the highest expression in gut  
387 sensory neurones, has also been described as a novel mechanotransducer [50]  
388 providing a further potential point of molecular integration for acid-induced  
389 mechanosensitisation. We observed no overt difference in the mechanosensitivity of

390 NMR colonic afferents compared to mouse at baseline conditions, suggesting that  
391 visceral mechanotransduction is not significantly altered in the NMR. By contrast we  
392 did see greatly differing responses to both, the direct exposure of extracellular acid  
393 and to induced mechanical hypersensitivity, implicating altered integration of acid  
394 sensors, mechanotransducers and modulators of spontaneous afferent firing.

395

396 NMR acid sensing differs significantly to other mammals. For example, in hippocampal  
397 and cortex neurones, the peak current density of NMR ASIC-like responses is reduced  
398 compared to mouse brain neurones [51], a likely adaptation to the NMR relying on  
399 fructose-fuelled glycolysis to sustain life during severe hypoxia that would generate  
400 lactic acid as a by-product [52]. In the peripheral nervous system, subcutaneous  
401 injection of acid (pH 3.5), capsaicin or histamine does not cause the nocifensive or  
402 pruriceptive behaviours in NMR that such stimuli characteristically induce in mice  
403 [10,11]. This acid insensitivity is a function of altered ASIC responses compared to  
404 mouse [18] and a variation in NMR Nav1.7, which renders the channel hypersensitive  
405 to proton-mediated block and therefore prevents acid-driven action potential initiation  
406 from the skin [17]. We have shown previously that pharmacological inhibition or  
407 genetic ablation of Nav1.7 in mouse does not impair colonic afferent firing or alter pain  
408 behaviours [24]. Therefore, if Nav1.7 is redundant in colonic afferents compared to  
409 those innervating the hindpaw, then it would be predicted that NMR colonic afferents  
410 would not be as insensitive to acid as their somatic equivalents. Whilst we observed a  
411 trend towards low firing rates in response to application of acid to NMR colonic  
412 afferents compared mouse, these did not differ significantly. As shown previously, acid  
413 alone was unable to induce mechanical sensitisation in mouse colonic afferents [33],  
414 whereas robust sensitisation was observed in NMR colonic afferents, i.e. there is likely  
415 differential coupling of molecular acid sensors to mechanotransducers in mouse and  
416 NMR.

417

418 In NMRs, the absence of thermal hypersensitivity induced by capsaicin and lack of  
419 histamine-induced scratching are thought to be due to a lack of cutaneous  
420 neuropeptides, such that both behaviours can be “rescued” by intrathecal  
421 administration of SP [10,11]. We show here by immunohistochemistry that CGRP is  
422 expressed within nerve fibres found encapsulating both blood vessels of the NMR  
423 colonic mesentery and myenteric plexi within the smooth muscle layers of the colon

424 wall, which aligns with previous findings of CGRP-positive fibres innervating NMR  
425 mesenteric arteries [26]. By contrast, whilst PGP9.5 staining identified nerve fibres  
426 within the submucosa these did not express CGRP, highlighting potential restricted  
427 penetration of extrinsic sensory fibres innervating the NMR colorectum.

428

429 We also found that the inflammatory mediator bradykinin failed to activate NMR  
430 colonic afferents, but that it could induce a robust mechanical hypersensitisation  
431 comparable to the effects in mouse. Although we do not confirm bradykinin B2  
432 receptor expression in NMR colonic afferents in this study, such mechanical  
433 hypersensitivity suggests that the B2 receptor activity is unimpaired, but that alternate  
434 coupling to its molecular transducers (including  $K_v7$  [53], TRPV1 [54], TRPA1 [55],  
435  $Ca^{2+}$ -activated  $Cl^-$  channels [53,56] and  $K_{Ca}$  [57,58]) may explain the altered response  
436 profiles compared to mouse.

437

438 Understanding how noxious pH is sensed and gastrointestinal homeostasis is  
439 maintained in the NMR may help to inform our understanding of other model species  
440 and gastrointestinal acid sensing during human disease. One explanation for the  
441 altered colonic afferent sensitivities observed may be differences in the microbiome  
442 between species. Microbiota can generate metabolites (including organic acids) that  
443 have a significant bearing on luminal acidity. And vice versa, variations in luminal pH  
444 can greatly impact microbiota diversity and activity [59]. Indeed, NMR gut microbiota  
445 is distinct from other rodents, with a greater propensity to produce increased levels of  
446 SCFAs and support anaerobic oxidative metabolism, which is probably as a result of  
447 their relatively homogeneous diet [60]. Such altered gut metabolism may explain the  
448 greater tolerances observed in colonic afferent sensitivities to acid and noxious  
449 inflammatory stimuli, alongside other adaptations to habitat. Further studies are  
450 required to fully understand how the NMR maintains gut pH homeostasis whilst  
451 balancing adaptations enabling a fitness advantage through acid insensitivity.

## 452 Acknowledgements

453 The authors declare no competing financial interests. This work was supported by  
454 Rosetrees Postdoctoral Grant (A1296; JRFH and EStJS), BBSRC grant  
455 (BB/R006210/1; JRFH and EStJS), Versus Arthritis Pain Challenge Grant (RG21973;  
456 GC and EStJS), EMBO Long-Term Fellowship (ALTF1565-2015; ZH) and University  
457 of Cambridge Vice Chancellor's Award (TST).

458

## 459 Author Contributions

460

461 JRFH designed the research studies, conducted the experiments, acquired and  
462 analysed the data and wrote the manuscript. TST, GC and ZH acquired and analysed  
463 the data. EStJS designed the research studies and wrote the manuscript. All authors  
464 approve the final version of the manuscript.

465

## 466 Declaration of Conflicting Interests

467

468 The authors have no conflicting interests to declare.

## 469 References

- 470 1. Holzer P. Acid sensing by visceral afferent neurones. *Acta Physiol (Oxf)* [Internet].  
471 2011;201:63–75. Available from: <http://www.ncbi.nlm.nih.gov/pubmed/20456281>
- 472 2. Fülling C, Dinan TG, Cryan JF. Gut Microbe to Brain Signaling: What Happens in  
473 Vagus.... *Neuron* [Internet]. 2019;101:998–1002. Available from:  
474 <http://www.ncbi.nlm.nih.gov/pubmed/30897366>
- 475 3. Sengupta JN, Su X, Gebhart GF. Kappa, but not mu or delta, opioids attenuate  
476 responses to distention of afferent fibers innervating the rat colon. *Gastroenterology*  
477 [Internet]. 1996;111:968–80. Available from:  
478 <https://www.ncbi.nlm.nih.gov/pubmed/8831591>
- 479 4. Su X, Gebhart GF. Mechanosensitive pelvic nerve afferent fibers innervating the  
480 colon of the rat are polymodal in character. *J Neurophysiol* [Internet]. 1998;80:2632–  
481 44. Available from: <http://www.ncbi.nlm.nih.gov/pubmed/9819269>
- 482 5. Brookes SJ, Spencer NJ, Costa M, Zagorodnyuk VP. Extrinsic primary afferent  
483 signalling in the gut. *Nat Rev Gastroenterol Hepatol* [Internet]. 2013;10:286–96.  
484 Available from: <http://www.ncbi.nlm.nih.gov/pubmed/23438947>
- 485 6. Nugent SG, Kumar D, Rampton DS, Evans DF. Intestinal luminal pH in  
486 inflammatory bowel disease: possible determinants and implications for therapy with  
487 aminosalicylates and other drugs. *Gut* [Internet]. 2001;48:571–7. Available from:  
488 <http://www.ncbi.nlm.nih.gov/pubmed/11247905>
- 489 7. Fallingborg J. Intraluminal pH of the human gastrointestinal tract. *Dan Med Bull*  
490 [Internet]. 1999;46:183–96. Available from:  
491 <https://www.ncbi.nlm.nih.gov/pubmed/10421978>
- 492 8. Andersen JR, Bendtsen F, Ovesen L, Pedersen NT, Rune SJ, Tage-Jensen U.  
493 Pancreatic insufficiency. Duodenal and jejunal pH, bile acid activity, and micellar lipid  
494 solubilization. *Int J Pancreatol* [Internet]. 1990;6:263–70. Available from:  
495 <http://www.ncbi.nlm.nih.gov/pubmed/2212745>
- 496 9. Fallingborg J, Christensen LA, Jacobsen BA, Rasmussen SN. Very low  
497 intraluminal colonic pH in patients with active ulcerative colitis. *Dig Dis Sci* [Internet].  
498 1993;38:1989–93. Available from: <https://www.ncbi.nlm.nih.gov/pubmed/8223071>
- 499 10. Park TJ, Lu Y, Jüttner R, Smith ES, Hu J, Brand A, et al. Selective inflammatory  
500 pain insensitivity in the African naked mole-rat (*Heterocephalus glaber*). *PLoS Biol*  
501 [Internet]. 2008;6:e13. Available from:

502 <http://www.ncbi.nlm.nih.gov/pubmed/18232734>

503 11. Smith ESJ, Blass GRC, Lewin GR, Park TJ. Absence of histamine-induced itch  
504 in the African naked mole-rat and “rescue” by Substance P. *Mol Pain*. 2010;6:29.

505 12. Omerbašić D, Smith ESJ, Moroni M, Homfeld J, Eigenbrod O, Bennett NC, et al.  
506 Hypofunctional TrkA Accounts for the Absence of Pain Sensitization in the African  
507 Naked Mole-Rat. *Cell Rep* [Internet]. 2016;17:748–58. Available from:  
508 <https://www.ncbi.nlm.nih.gov/pubmed/27732851>

509 13. Steen KH, Reeh PW. Sustained graded pain and hyperalgesia from harmless  
510 experimental tissue acidosis in human skin. *Neurosci Lett* [Internet]. 1993;154:113–  
511 6. Available from: <http://www.ncbi.nlm.nih.gov/pubmed/8361622>

512 14. Sugiura T, Bielefeldt K, Gebhart GF. Mouse colon sensory neurons detect  
513 extracellular acidosis via TRPV1. *Am J Physiol Cell Physiol*. 2007;292:C1768–74.

514 15. Hockley JRFF, Taylor TS, Callejo G, Wilbrey AL, Gutteridge A, Bach K, et al.  
515 Single-cell RNAseq reveals seven classes of colonic sensory neuron. *Gut* [Internet].  
516 2019;68:633–44. Available from: <http://www.ncbi.nlm.nih.gov/pubmed/29483303>

517 16. Schuhmacher L-N, Smith ESJ. Expression of acid-sensing ion channels and  
518 selection of reference genes in mouse and naked mole rat. *Mol Brain* [Internet].  
519 2016;9:97. Available from: <http://www.ncbi.nlm.nih.gov/pubmed/27964758>

520 17. Smith ES, Omerbašić D, Lechner SG, Anirudhan G, Lapatsina L, Lewin GR. The  
521 molecular basis of acid insensitivity in the African naked mole-rat. *Science* (80- )  
522 [Internet]. 2011;334:1557–60. Available from:  
523 <http://www.ncbi.nlm.nih.gov/pubmed/22174253>

524 18. Schuhmacher L-N, Callejo G, Srivats S, Smith ESJ. Naked mole-rat acid-sensing  
525 ion channel 3 forms nonfunctional homomers, but functional heteromers. *J Biol*  
526 *Chem* [Internet]. 2018;293:1756–66. Available from:  
527 <http://www.jbc.org/lookup/doi/10.1074/jbc.M117.807859>

528 19. Schuhmacher L-N, Husson, Zoé SESJ. The naked mole-rat as an animal model  
529 in biomedical research: current perspectives. *Open Access Anim Physiol* [Internet].  
530 2015;Volume 7:137. Available from: [https://www.dovepress.com/the-naked-mole-rat-](https://www.dovepress.com/the-naked-mole-rat-as-an-animal-model-in-biomedical-research-current-p-peer-reviewed-fulltext-article-OAAP)  
531 [as-an-animal-model-in-biomedical-research-current-p-peer-reviewed-fulltext-article-](https://www.dovepress.com/the-naked-mole-rat-as-an-animal-model-in-biomedical-research-current-p-peer-reviewed-fulltext-article-OAAP)  
532 [OAAP](https://www.dovepress.com/the-naked-mole-rat-as-an-animal-model-in-biomedical-research-current-p-peer-reviewed-fulltext-article-OAAP)

533 20. Firth M, Prather CM. Gastrointestinal motility problems in the elderly patient.  
534 *Gastroenterology* [Internet]. 2002;122:1688–700. Available from:  
535 <http://www.ncbi.nlm.nih.gov/pubmed/12016432>

- 536 21. Hockley JRF, Boundouki G, Cibert-Goton V, McGuire C, Yip PK, Chan C, et al.  
537 Multiple roles for Na(V)1.9 in the activation of visceral afferents by noxious  
538 inflammatory, mechanical, and human disease-derived stimuli. *Pain* [Internet].  
539 2014;155:1962–75. Available from: <http://www.ncbi.nlm.nih.gov/pubmed/24972070>
- 540 22. Hughes PA, Brierley SM, Martin CM, Brookes SJH, Linden DR, Blackshaw LA, et al.  
541 al. Post-inflammatory colonic afferent sensitisation: different subtypes, different  
542 pathways and different time courses. *Gut* [Internet]. 2009;58:1333–41. Available  
543 from: <http://www.ncbi.nlm.nih.gov/pubmed/19324867>
- 544 23. Ness TJ, Gebhart GF. Colorectal distension as a noxious visceral stimulus:  
545 physiologic and pharmacologic characterization of pseudoaffective reflexes in the rat.  
546 *Brain Res* [Internet]. 1988;450:153–69. Available from:  
547 <http://www.ncbi.nlm.nih.gov/pubmed/3401708>
- 548 24. Hockley JR, González-Cano R, McMurray S, Tejada-Giraldez MA, McGuire C,  
549 Torres A, et al. Visceral and somatic pain modalities reveal NaV 1.7-independent  
550 visceral nociceptive pathways. *J Physiol* [Internet]. 2017;595:2661–79. Available  
551 from: <https://www.ncbi.nlm.nih.gov/pubmed/28105664>
- 552 25. Spencer NJ, Zagorodnyuk V, Brookes SJ, Hibberd T. Spinal afferent nerve  
553 endings in visceral organs: recent advances. *Am J Physiol Gastrointest Liver Physiol*  
554 [Internet]. 2016;311:G1056–63. Available from:  
555 <http://www.ncbi.nlm.nih.gov/pubmed/27856418>
- 556 26. Park TJ, Comer C, Carol A, Lu Y, Hong HS, Rice FL. Somatosensory  
557 organization and behavior in naked mole-rats: II. Peripheral structures, innervation,  
558 and selective lack of neuropeptides associated with thermoregulation and pain. *J*  
559 *Comp Neurol*. 2003;465:104–20.
- 560 27. Grundy L, Erickson A, Brierley SM. Visceral Pain. *Annu Rev Physiol* [Internet].  
561 2019;81:261–84. Available from: <http://www.ncbi.nlm.nih.gov/pubmed/30379615>
- 562 28. Cervero F. Neurophysiology of gastrointestinal pain. *Baillieres Clin Gastroenterol*  
563 [Internet]. 1988;2:183–99. Available from:  
564 <http://www.ncbi.nlm.nih.gov/pubmed/2838108>
- 565 29. Booth CE, Shaw J, Hicks GA, Kirkup AJ, Winchester W, Grundy D. Influence of  
566 the pattern of jejunal distension on mesenteric afferent sensitivity in the  
567 anaesthetized rat. *Neurogastroenterol Motil* [Internet]. 2008;20:149–58. Available  
568 from: <http://www.ncbi.nlm.nih.gov/pubmed/17931340>
- 569 30. Christianson JA, Gebhart GF. Assessment of colon sensitivity by luminal



570 distension in mice. *Nat Protoc* [Internet]. 2007;2:2624–31. Available from:  
571 <http://www.ncbi.nlm.nih.gov/pubmed/17948005>

572 31. Holzer P. Acid-sensing ion channels in gastrointestinal function.  
573 *Neuropharmacology* [Internet]. Elsevier Ltd; 2015;94:72–9. Available from:  
574 <http://dx.doi.org/10.1016/j.neuropharm.2014.12.009>

575 32. Schwarz MG, Namer B, Reeh PW, Fischer MJM. TRPA1 and TRPV1  
576 Antagonists Do Not Inhibit Human Acidosis-Induced Pain. *J Pain* [Internet].  
577 2017;18:526–34. Available from: <http://www.ncbi.nlm.nih.gov/pubmed/28062311>

578 33. Jones RC, Xu L, Gebhart GF. The mechanosensitivity of mouse colon afferent  
579 fibers and their sensitization by inflammatory mediators require transient receptor  
580 potential vanilloid 1 and acid-sensing ion channel 3. *J Neurosci* [Internet].  
581 2005;25:10981–9. Available from: <http://www.ncbi.nlm.nih.gov/pubmed/16306411>

582 34. Peiris M, Hockley JR, Reed DE, Smith ESJ, Bulmer DC, Blackshaw LA.  
583 Peripheral KV7 channels regulate visceral sensory function in mouse and human  
584 colon. *Mol Pain* [Internet]. 2017;13:1744806917709371. Available from:  
585 <https://www.ncbi.nlm.nih.gov/pubmed/28566000>

586 35. McGuire C, Boundouki G, Hockley JR, Reed D, Cibert-Goton V, Peiris M, et al.  
587 Ex vivo study of human visceral nociceptors. *Gut* [Internet]. 2016; Available from:  
588 <https://www.ncbi.nlm.nih.gov/pubmed/27654583>

589 36. Soto E, Ortega-Ramírez A, Vega R. Protons as Messengers of Intercellular  
590 Communication in the Nervous System. *Front Cell Neurosci* [Internet]. 2018;12:342.  
591 Available from: <http://www.ncbi.nlm.nih.gov/pubmed/30364044>

592 37. Hughes PA, Brierley SM, Young RL, Blackshaw LA. Localization and  
593 comparative analysis of acid-sensing ion channel (ASIC1, 2, and 3) mRNA  
594 expression in mouse colonic sensory neurons within thoracolumbar dorsal root  
595 ganglia. *J Comp Neurol* [Internet]. 2007;500:863–75. Available from:  
596 <http://www.ncbi.nlm.nih.gov/pubmed/17177258>

597 38. Tominaga M, Caterina MJ, Malmberg AB, Rosen TA, Gilbert H, Skinner K, et al.  
598 The cloned capsaicin receptor integrates multiple pain-producing stimuli. *Neuron*  
599 [Internet]. 1998;21:531–43. Available from:  
600 <http://www.ncbi.nlm.nih.gov/pubmed/9768840>

601 39. Suzuki M, Mizuno A, Kodaira K, Imai M. Impaired pressure sensation in mice  
602 lacking TRPV4. *J Biol Chem* [Internet]. 2003;278:22664–8. Available from:  
603 <http://www.ncbi.nlm.nih.gov/pubmed/12692122>

604 40. Semtner M, Schaefer M, Pinkenburg O, Plant TD. Potentiation of TRPC5 by  
605 protons. *J Biol Chem* [Internet]. 2007;282:33868–78. Available from:  
606 <http://www.ncbi.nlm.nih.gov/pubmed/17884814>

607 41. Brierley SM, Page AJ, Hughes PA, Adam B, Liebrechts T, Cooper NJ, et al.  
608 Selective role for TRPV4 ion channels in visceral sensory pathways.  
609 *Gastroenterology* [Internet]. 2008;134:2059–69. Available from:  
610 <http://www.ncbi.nlm.nih.gov/pubmed/18343379>[http://www.ncbi.nlm.nih.gov/pmc/artic  
611 les/PMC2504007/pdf/nihms58638.pdf](http://www.ncbi.nlm.nih.gov/pmc/articles/PMC2504007/pdf/nihms58638.pdf)

612 42. Chen BN, Olsson C, Sharrad DF, Brookes SJH. Sensory innervation of the  
613 guinea pig colon and rectum compared using retrograde tracing and  
614 immunohistochemistry. *Neurogastroenterol Motil* [Internet]. 2016;28:1306–16.  
615 Available from: <http://www.ncbi.nlm.nih.gov/pubmed/27038370>

616 43. Wynn G, Burnstock G. Adenosine 5'-triphosphate and its relationship with other  
617 mediators that activate pelvic nerve afferent neurons in the rat colorectum.  
618 *Purinergic Signal* [Internet]. 2006;2:517–26. Available from:  
619 <http://www.ncbi.nlm.nih.gov/pubmed/18404489>[http://www.ncbi.nlm.nih.gov/pmc/artic  
620 les/PMC2104004/pdf/11302\\_2005\\_Article\\_5305.pdf](http://www.ncbi.nlm.nih.gov/pmc/articles/PMC2104004/pdf/11302_2005_Article_5305.pdf)

621 44. Holzer P. Acid-sensitive ion channels and receptors. *Handb Exp Pharmacol*  
622 [Internet]. 2009;283–332. Available from:  
623 <http://www.ncbi.nlm.nih.gov/pubmed/19655111>

624 45. La JH, Gebhart GF. Colitis decreases mechanosensitive K2P channel  
625 expression and function in mouse colon sensory neurons. *Am J Physiol Gastrointest  
626 Liver Physiol* [Internet]. 2011;301:G165-74. Available from:  
627 <https://www.ncbi.nlm.nih.gov/pubmed/21512155>

628 46. North RA. Molecular physiology of P2X receptors. *Physiol Rev* [Internet].  
629 2002;82:1013–67. Available from: <http://www.ncbi.nlm.nih.gov/pubmed/12270951>

630 47. Shinoda M, La J-HH, Bielefeldt K, Gebhart GF. Altered purinergic signaling in  
631 colorectal dorsal root ganglion neurons contributes to colorectal hypersensitivity. *J  
632 Neurophysiol* [Internet]. 2010;104:3113–23. Available from:  
633 [http://www.pubmedcentral.nih.gov/articlerender.fcgi?artid=3007642&tool=pmcentrez  
634 &rendertype=abstract](http://www.pubmedcentral.nih.gov/articlerender.fcgi?artid=3007642&tool=pmcentrez)

635 48. Burnstock G. Purine-mediated signalling in pain and visceral perception. *Trends  
636 Pharmacol Sci*. 2001;22:182–8.

637 49. Xu G-YY, Shenoy M, Winston JH, Mittal S, Pasricha PJ. P2X receptor-mediated

638 visceral hyperalgesia in a rat model of chronic visceral hypersensitivity. *Gut*  
639 [Internet]. 2008;57:1230–7. Available from:  
640 <http://www.ncbi.nlm.nih.gov/pubmed/18270243>

641 50. Xu J, Mathur J, Vessières E, Hammack S, Nonomura K, Favre J, et al. GPR68  
642 Senses Flow and Is Essential for Vascular Physiology. *Cell* [Internet]. 2018;173:762–  
643 775.e16. Available from: <http://www.ncbi.nlm.nih.gov/pubmed/29677517>

644 51. Husson Z, Smith ESJ. Naked mole-rat cortical neurons are resistant to acid-  
645 induced cell death. *Mol Brain* [Internet]. 2018;11:26. Available from:  
646 <http://www.ncbi.nlm.nih.gov/pubmed/29739425>

647 52. Park TJ, Reznick J, Peterson BL, Blass G, Omerbašić D, Bennett NC, et al.  
648 Fructose-driven glycolysis supports anoxia resistance in the naked mole-rat. *Science*  
649 [Internet]. 2017;356:307–11. Available from:  
650 <http://www.ncbi.nlm.nih.gov/pubmed/28428423>

651 53. Liu B, Linley JE, Du X, Zhang X, Ooi L, Zhang H, et al. The acute nociceptive  
652 signals induced by bradykinin in rat sensory neurons are mediated by inhibition of M-  
653 type K<sup>+</sup> channels and activation of Ca<sup>2+</sup>-activated Cl<sup>-</sup> channels. *J Clin Invest*  
654 [Internet]. 2010;120:1240–52. Available from:  
655 <https://www.ncbi.nlm.nih.gov/pubmed/20335661>

656 54. Lee SY, Lee JH, Kang KK, Hwang SY, Choi KD, Oh U. Sensitization of vanilloid  
657 receptor involves an increase in the phosphorylated form of the channel. *Arch Pharm*  
658 *Res* [Internet]. 2005;28:405–12. Available from:  
659 <https://www.ncbi.nlm.nih.gov/pubmed/15918513>

660 55. Wang S, Dai Y, Fukuoka T, Yamanaka H, Kobayashi K, Obata K, et al.  
661 Phospholipase C and protein kinase A mediate bradykinin sensitization of TRPA1: a  
662 molecular mechanism of inflammatory pain. *Brain* [Internet]. 2008;131:1241–51.  
663 Available from: <https://www.ncbi.nlm.nih.gov/pubmed/18356188>

664 56. Oh EJ, Weinreich D. Bradykinin decreases K<sup>(+)</sup> and increases Cl<sup>(-)</sup>  
665 conductances in vagal afferent neurones of the guinea pig. *J Physiol* [Internet].  
666 2004;558:513–26. Available from: <https://www.ncbi.nlm.nih.gov/pubmed/15169850>

667 57. Weinreich D. Bradykinin inhibits a slow spike afterhyperpolarization in visceral  
668 sensory neurons. *Eur J Pharmacol* [Internet]. 1986;132:61–3. Available from:  
669 <https://www.ncbi.nlm.nih.gov/pubmed/3816966>

670 58. Udem BJ, Weinreich D. Electrophysiological properties and chemosensitivity of  
671 guinea pig nodose ganglion neurons in vitro. *J Aut Nerv Syst* [Internet]. 1993;44:17–

672 33. Available from: <https://www.ncbi.nlm.nih.gov/pubmed/8104970>

673 59. Tana C, Umesaki Y, Imaoka A, Handa T, Kanazawa M, Fukudo S. Altered  
674 profiles of intestinal microbiota and organic acids may be the origin of symptoms in  
675 irritable bowel syndrome. *Neurogastroenterol Motil* [Internet]. 2009; Available from:  
676 <http://doi.wiley.com/10.1111/j.1365-2982.2009.01427.x>

677 60. Debebe T, Biagi E, Soverini M, Holtze S, Hildebrandt TB, Birkemeyer C, et al.  
678 Unraveling the gut microbiome of the long-lived naked mole-rat. *Sci Rep* [Internet].  
679 2017;7:9590. Available from: <http://www.ncbi.nlm.nih.gov/pubmed/28852094>

680

681 **Figure Legends**

682 **Figure 1. Extrinsic sensory innervation of NMR colorectum**

683 A. Comparison of mouse and NMR gastrointestinal tracts from anus (*left*) to  
684 oesophagus (*right*), with a 30 cm ruler providing scale. Wholemout immunostaining  
685 for CGRP in the mesentery (B; *insert*, nerve fibres encircling a mesenteric blood  
686 vessel. *Arrows*, example nerve fibre on the blood vessel margin), myenteric plexi (C;  
687 *insert*, extrinsic nerve fibres infiltrating myenteric ganglia) and submucosa (D) of NMR.  
688 Equivalent nerve fibre staining was also observed with PGP9.5 in the mesentery (E;  
689 *insert*, nerve fibre surrounding mesenteric blood vessel), myenteric plexi (F),  
690 submucosa (G; *insert*, nerve fibre surrounding the base of a mucosal villi), circular  
691 muscle (H) and longitudinal muscle (I; *arrows*, nerve fibre innervating longitudinal  
692 muscle). Scale bar in each panel, 50  $\mu$ m.

693

694 **Figure 2. Colonic afferent responses to noxious ramp and repeat phasic**  
695 **distension in mouse and NMR**

696 A. Example rate histograms of colonic lumbar splanchnic nerve activity from mouse  
697 and NMR with intraluminal pressure trace and neurogram trace following ramp  
698 distension (0 to 80 mmHg) and repeat phasic distension (0-80 mmHg, 60 s, 9 min  
699 intervals). Below, expanded neurogram traces showing NMR before and after phasic  
700 distension and an example trace showing three action potentials. B. Mean firing rates  
701 to ramp distension at 5 mmHg increments in mouse and NMR ( $P = 0.67$ ,  $N = 5-6$ , two-  
702 way repeated-measures ANOVA). C. Average change in peak firing rate during repeat  
703 phasic distension in mouse and NMR ( $P = 0.74$ , two-way repeated-measures  
704 ANOVA).

705

706 **Figure 3. Extracellular acid evokes mechanical hypersensitivity in NMR, but not**  
707 **mouse**

708 A. Example rate histograms of colonic splanchnic nerve activity from mouse and NMR  
709 with accompanying pressure trace showing bath superfusion of pH 4.0 Krebs buffer  
710 (50 mL) and subsequent repeat (x 3) phasic distension. B. Mean increase in peak  
711 firing after application of pH 4.0 ( $P = 0.07$ ,  $N = 6$ , unpaired t-test). C. Peak firing change  
712 to phasic distension after superfusion with pH 4.0 solution. The response to phasic

713 distension in NMR, but not mouse, was significantly sensitised by acid ( $***P < 0.01$ ,  $N$   
714 = 6, two-way repeated-measures ANOVA with Sidak's post-hoc).

715

716 **Figure 4. Colonic afferent excitation to bradykinin is blunted in NMR, but**  
717 **mechanical sensitisation is unaffected**

718

719 A. Example rate histograms of colonic splanchnic nerve activity from mouse and NMR  
720 with accompanying pressure trace showing addition of 1  $\mu\text{M}$  bradykinin (20 mL) and  
721 subsequent repeat (x 3) phasic distension. B. Mean increase in peak firing after  
722 application of 1  $\mu\text{M}$  bradykinin ( $***P < 0.001$ ,  $N = 6$ , unpaired t-test). C. Peak firing  
723 change to phasic distension after superfusion with 1  $\mu\text{M}$  bradykinin. The response to  
724 phasic distension in both NMR and mouse was significantly sensitised by application  
725 of bradykinin ( $*P < 0.05$  vs. 9<sup>th</sup> distension in NMR,  $##P < 0.01$  vs. 9<sup>th</sup> distension in  
726 mouse,  $N = 6$ , two-way repeated-measures ANOVA with Sidak's post-hoc). *Insert*,  
727 phasic distension responses in both NMR and mouse normalised to the pre-bradykinin  
728 distension response ( $**P < 0.01$  vs. normalised 9<sup>th</sup> distension in NMR,  $###P < 0.001$  vs.  
729 normalised 9<sup>th</sup> distension in mouse,  $N = 6$ , two-way repeated-measures ANOVA with  
730 Sidak's post-hoc).
